# Supplementary material
Source: PubMed Central journal article supplement (PMC3311872)
Supplement: NIHMS352845-supplement-supp_1.pdf [file NIHMS352845-supplement-supp_1.pdf]

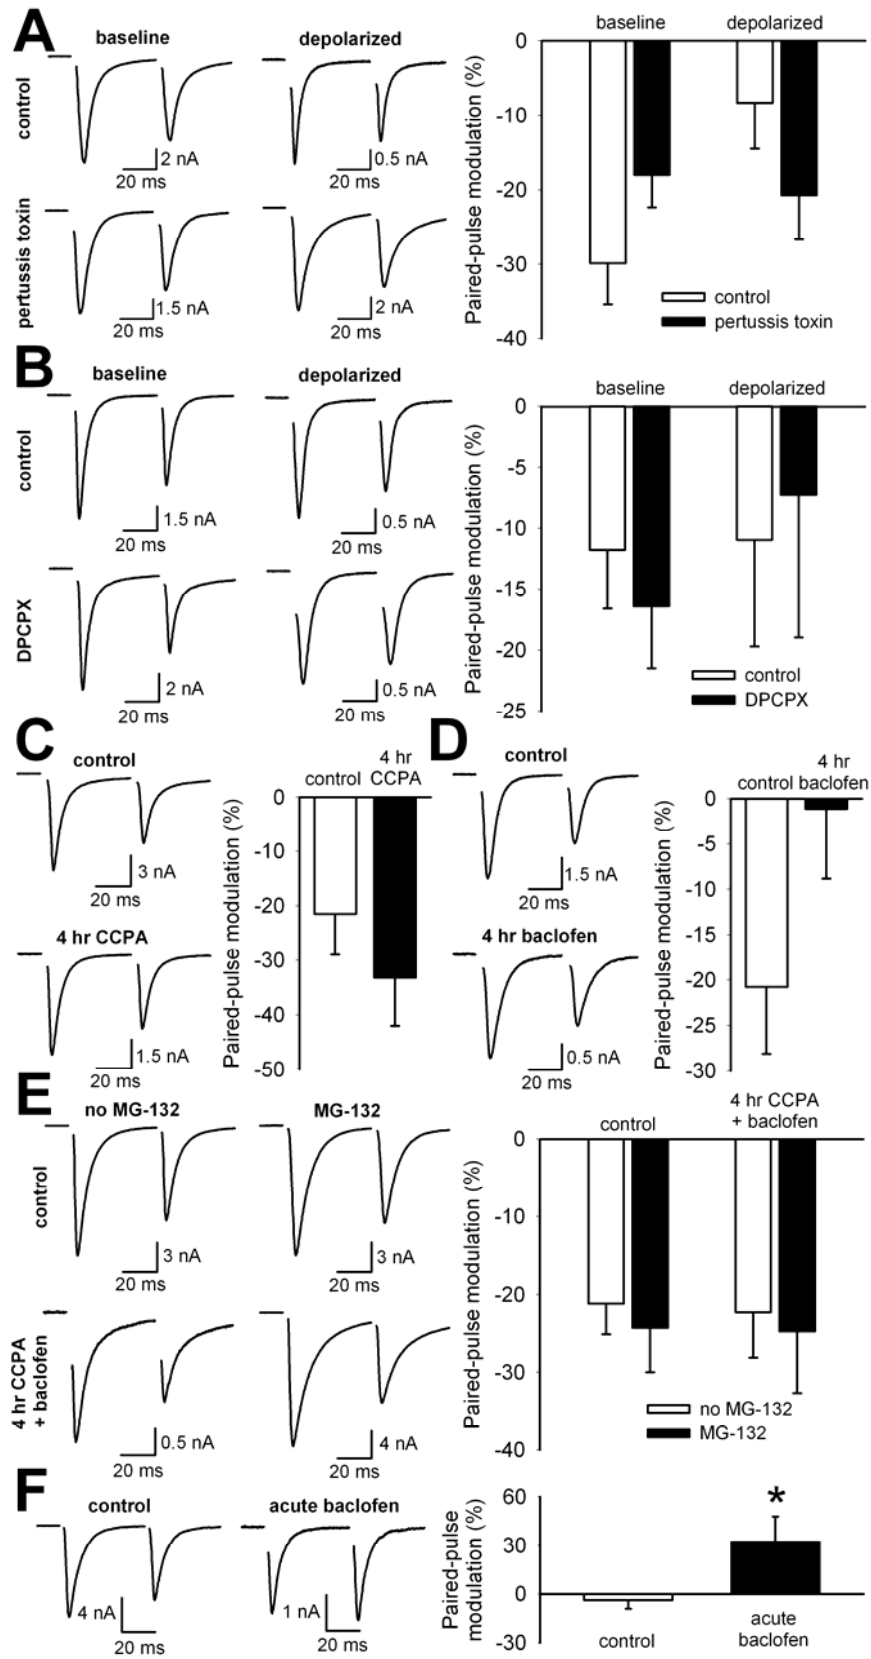

**Supplemental Figure 1.** Acute, but not prolonged, treatments alter paired-pulse modulation in excitatory autaptic neurons. **A.** Left panel: example action-potential evoked EPSCs with 50 ms interstimulus interval from autaptic neurons treated 24 hr with or without 500 ng/ml pertussis toxin before 4 hr co-application with 30 mM NaCl (baseline) or 30 mM KCl (depolarized). Right panel: summary of percentage change in EPSC amplitude during 50 ms paired-pulse stimulus in neurons treated as described in the left panel.  $p = 0.09-1.00$  with Bonferroni correction for multiple comparisons ( $n = 13-14$ ). **B.** Left panel: example action-potential evoked EPSCs with 50 ms interstimulus interval from autaptic neurons treated 4 hr with 30 mM NaCl (baseline) or 30 mM KCl (depolarized) in the presence or absence of 200 nM DPCPX. Right panel: summary of percentage change in EPSC amplitude during 50 ms paired-pulse stimulus in neurons treated as described in the left panel.  $p = 0.59-1.00$  with Bonferroni correction for multiple comparisons ( $n = 9$ ). **C.** Left panel: example action-potential evoked EPSCs with 50 ms interstimulus interval from autaptic neurons treated either acutely ( $< 1$  min; control) or for 4 hr with 10 nM CCPA. Right panel: summary of percentage change in EPSC amplitude during 50 ms paired-pulse stimulus in neurons treated as described in the left panel.  $p = 0.79$  ( $n = 9-10$ ). **D.** Left panel: example action-potential evoked EPSCs with 50 ms interstimulus interval from autaptic neurons treated either acutely ( $< 1$  min; control) or for 4 hr with 50  $\mu$ M baclofen. Right panel: summary of percentage change in EPSC amplitude during 50 ms paired-pulse stimulus in neurons treated as described in the left panel.  $p = 0.08$  ( $n = 9$ ). **E.** Left panel: example action-potential evoked EPSCs with 50 ms interstimulus interval from autaptic neurons treated acutely ( $< 1$  min; control) or for 4 hr with 10 nM CCPA and 50  $\mu$ M baclofen with or without 3  $\mu$ M MG-132. MG-132 was added 30 min prior to the start of (and remained during) the 4 hr treatment. Right panel: summary of percentage change in EPSC amplitude during 50 ms paired-pulse stimulus in neurons treated as described in the left panel.  $p = 0.66-0.97$  without correction for multiple comparisons ( $n = 14-15$ ). **F.** Left panel: example action-potential evoked EPSCs with 50 ms interstimulus interval from autaptic neurons treated acutely with locally perfused saline control or 10  $\mu$ M baclofen. Right panel: summary of percentage change in EPSC amplitude during 50 ms paired-pulse stimulus in neurons treated as described in the left panel.  $*p = 0.04$  ( $n = 12$ ).

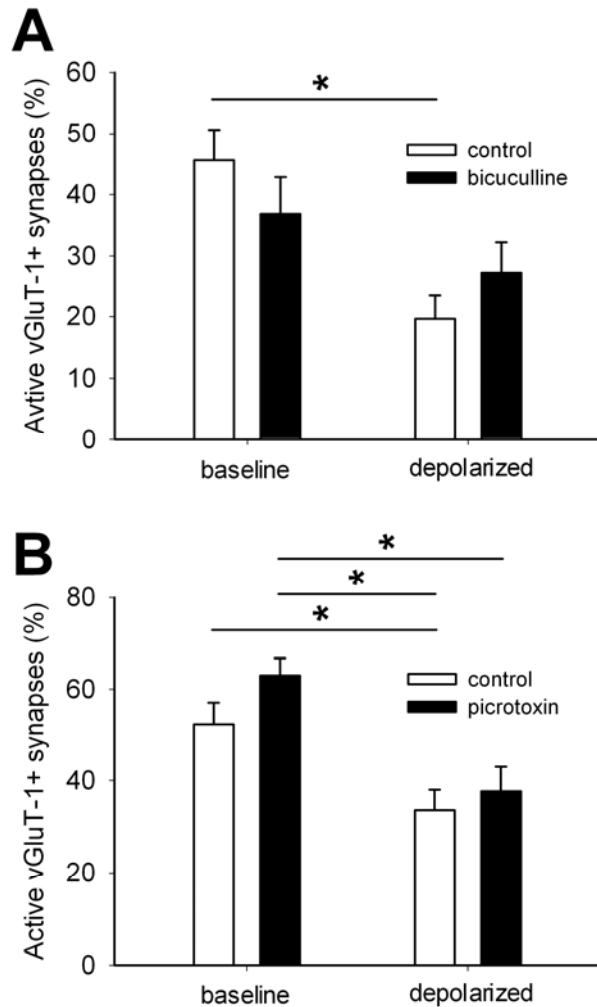

**Supplemental Figure 2.** Blocking GABA<sub>A</sub> receptors does not prevent depolarization-induced silencing. **A.** Summary of experiments measuring vGluT-1/FM1-43FX correspondence in neurons treated 4 hr with 30 mM NaCl (baseline) or 30 mM KCl (depolarized) in the presence or absence of 50  $\mu$ M bicuculline, a GABA<sub>A</sub> receptor antagonist.  $*p < 0.05$  with Bonferroni correction for multiple comparisons ( $n = 25$  fields from 5 independent experiments). **B.** Summary of experiments measuring vGluT-1/FM1-43FX correspondence in neurons treated 4 hr with 30 mM NaCl (baseline) or 30 mM KCl (depolarized) in the presence or absence of 100  $\mu$ M picrotoxin, another GABA<sub>A</sub> receptor antagonist.  $*p < 0.05$  with Bonferroni correction for multiple comparisons ( $n = 30$  fields from 6 independent experiments).

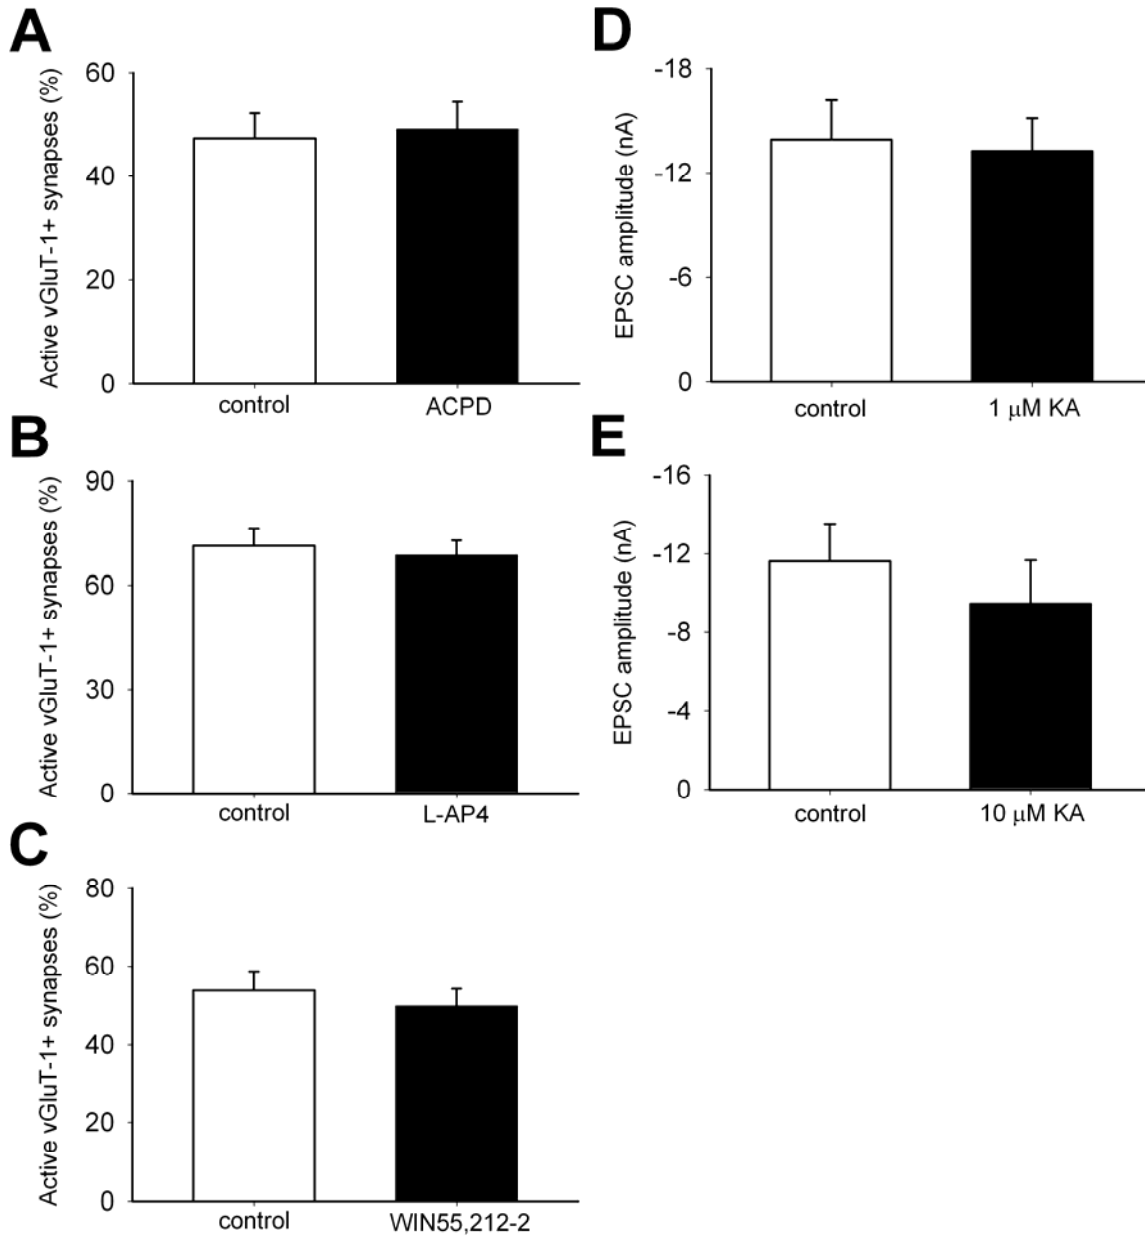

**Supplemental Figure 3.** mGluR, CB1, and kainate receptor agonists do not induce silencing. **A.** Summary of experiments measuring vGluT-1/FM1-43FX correspondence in neurons treated 4 hr with or without 200  $\mu$ M ACPD (mGluR agonist;  $n = 30$  fields from 6 coverslips;  $p = 0.81$ ). **B.** Summary of experiments measuring vGluT-1/FM1-43FX correspondence in neurons treated 4 hr with or without 10  $\mu$ M L-AP4 (mGluR agonist;  $n = 15$  fields from 3 coverslips;  $p = 0.69$ ). **C.** Summary of experiments measuring vGluT-1/FM1-43FX correspondence in neurons treated 4 hr with or without 1  $\mu$ M WIN55,212-2 (CB1 agonist;  $n = 40$  fields from 8 coverslips;  $p = 0.54$ ). **D.** Summary of experiments measuring EPSC amplitude in neurons treated 4 hr with or without 1  $\mu$ M kainic acid (KA; kainate receptor agonist;  $n = 12$  neurons;  $p = 0.82$ ). **E.** Summary of experiments measuring EPSC amplitude in neurons treated 4 hr with or without 10  $\mu$ M kainic acid ( $n = 11$  neurons;  $p = 0.47$ ).
